# Supplementary material for: A quaternized anthraquinone derivative for pH-neutral aqueous organic redox flow batteries
Source: Royal Society of Chemistry journal article supplement (doi:10.1039/d3nj00784g), 2023-01-01
Supplement: d3nj00784g1.pdf [file d3nj00784g1.pdf]

## Supporting Information

A quaternized anthraquinone derivative for pH-neutral aqueous organic redox flow batteries

Lei Xu, Qianwei Wang, Dengfeng Guo, Juan Xu,\* and Jianyu Cao\*

*Jiangsu Key Laboratory of Advanced Catalytic Materials and Technology, Changzhou University, Changzhou 213164, China.*

\*Corresponding author. E-mail: jycao@cczu.edu.cn (Jianyu Cao);

cjytion@cczu.edu.cn (Juan Xu)

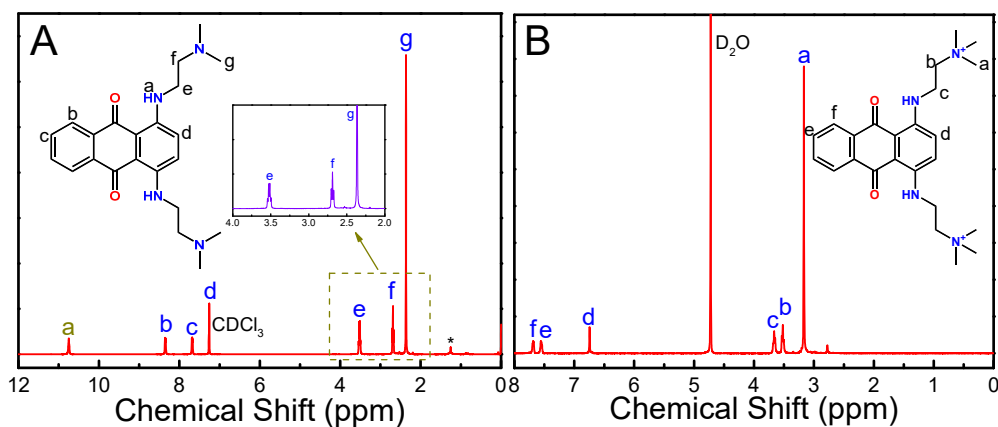

**Fig. S1** (A)  $^1\text{H}$  NMR spectrum of BDEAQ. (B)  $^1\text{H}$  NMR spectrum of BDEAQI<sub>2</sub>.

## Single Mass Analysis

Tolerance = 20.0 PPM / DBE: min = -1.5, max = 50.0

Element prediction: Off

Number of isotope peaks used for i-FIT = 3

Monoisotopic Mass, Even Electron Ions

1558 formula(e) evaluated with 1 results within limits (up to 50 closest results for each mass)

Elements Used:

C: 24-24 H: 35-35 N: 0-10 O: 0-41 Na: 0-3 Cl: 1-2

13

230216-7-17 (0.093)

1: TOF MS ES+  
8.36e+002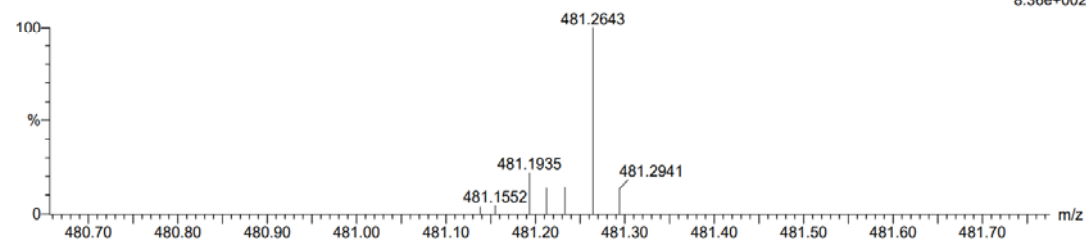Minimum: -1.5  
Maximum: 5.0 20.0 50.0

| Mass     | Calc. Mass | mDa  | PPM  | DBE | i-FIT | Norm | Conf (%) | Formula           |
|----------|------------|------|------|-----|-------|------|----------|-------------------|
| 481.2126 | 481.2137   | -1.1 | -2.3 | 8.5 | 51.8  | n/a  | n/a      | C24 H35 N4 O2 Cl2 |

Fig. S2 MS spectrum of BDEAQCl<sub>2</sub> in the form of positive ions.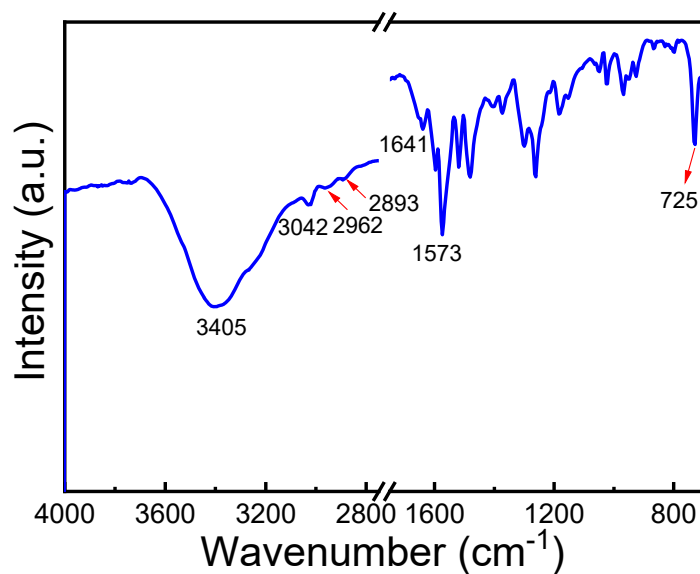Fig. S3 FTIR spectrum of BDEAQCl<sub>2</sub>.

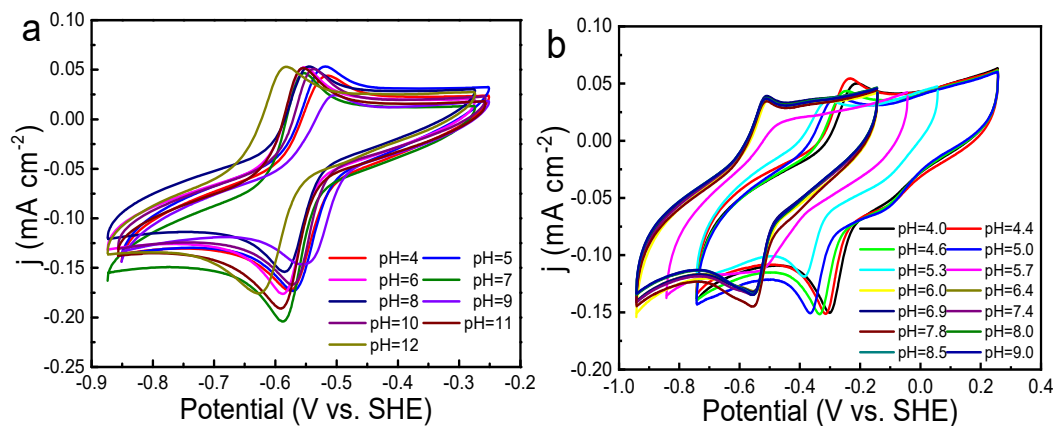

**Fig. S4** CVs of 1 mM BDEAQC1<sub>2</sub> on a glassy carbon electrode in unbuffered (a) and buffered (b) 1 M NaCl solutions with different pH. The pH buffer is a 0.1 M acetic acid/sodium acetate solution containing 1 M NaCl.
